# Supplementary material for: Burden and associated phenotypic characteristics of tuberculosis infection in adult Africans with diabetes: a systematic review
Source: Sci Rep. 2023 Nov 14;13:19894. doi: 10.1038/s41598-023-47285-4 (PMC10645877; doi:10.1038/s41598-023-47285-4)
Supplement: Supplementary file 1 — Supplementary Information. [file 41598_2023_47285_MOESM1_ESM.xlsx]

## Sheet: Sheet1
Author and year	Country	Region	Type of study	No of participants	Basis of DX of DM	Median/IQR age	Females-n, %	Duration of diabetes	Smoking- n, %	Alcohol use-n, %	HIV comorbidity-n, %	Proportion on insulin- n, %	Proportion on metformin- n, %	Proportion on SUs- n, %	BMI-Median/IQR	HbA1c, % - Median/IQR	FBG- Median/IQR	DX criteria of LTBI	Prevalence of LTBI using TST	Prevalence of LTBI using IGRA
Kazibwe et al. 2023	Uganda	Eastern	Cross-sectional	185	Based on tests and h/o being on Rx	50 (42-59)	145, 78.4	9 (5-20)	7, 3.8	33, 17.8		98, 53	162, 87.6	69, 37.3	28.6 (24.8-32.9)	8.4 (7.1-9.9)		IGRA-QFT-Plus test		57.4
Agha MA et al. 2020	Egypt	Northern	Cross-sectional	102	Based on tests and h/o being on Rx	50±10.1*	46, 45.1	7.5±6.0	32, 31.4				39, 38.2		35.1±5.5	8.1±1.7	145.8±46.6	TST and IGRA-QFT	8.8	21.6
Chukwudi UK et al 2020	Nigeria	Western	Case-control	240	Based on tests and h/o being on Rx														25	13.8
Adewole OO et al 2015	Nigeria	Western	Case-control	60	Based on tests and h/o being on Rx													IGRA-QFT-Plus test		37
Andia-Biraro I et al 2015	Uganda	Eastern	Case-control	103	Based on tests-newly diagnosed													IGRA-QFT-Plus test		73
Smith AGC et al 2022	Ethiopia	Eastern	Cross-sectional	31	Based on tests and h/o being on Rx	44.6 (40.3-50.4)	20, 64.5		3, 9.7	10, 9.7	3, 9.7	2, 6.5	11, 35.5	4, 12.9	26.1 (23.7-30.4)			IGRA-QFT-Plus test		87.1
